# Supplementary material for: VSTM2A reverses immunosuppression in colorectal cancer by antagonizing the PD-L1/PD-1 interaction
Source: PubMed Central journal article supplement (PMC11573612; doi:10.1016/j.ymthe.2024.09.023), 2024-09-17
Supplement: mmc1.pdf [file mmc1.pdf]

YMTHE, Volume 32

## **Supplemental Information**

### **VSTM2A reverses immunosuppression in colorectal cancer by antagonizing the PD-L1/PD-1 interaction**

**Yujuan Dong, Jiaxun Jade Liu, Yunfei Zhou, Wei Kang, Shanglin Li, Alvin H.K. Cheung, Yi Hu, Rui Liao, Nathalie Wong, Chi Chun Wong, Simon S.M. Ng, and Jun Yu**

**Figure S1**

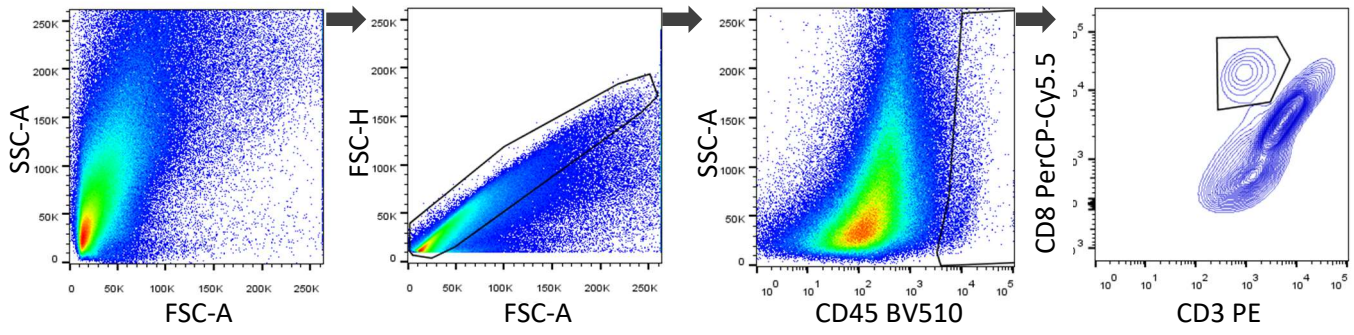

**Figure S1.** Gating strategy of immune cell subsets in AOM/DSS immunocompetent mice model.

**Figure S2**

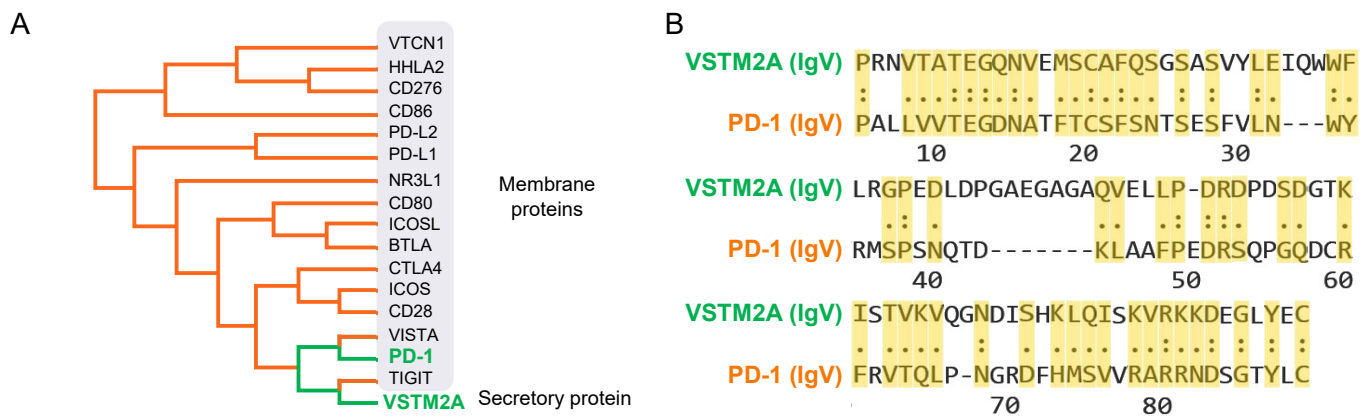

**Figure S2. (A)** Phylogenetic tree based on the IgV domain sequences of B7 and CD28 protein families. **(B)** Protein sequence alignments of PD-1 and VSTM2A IgV domain.

**Figure S3**

A

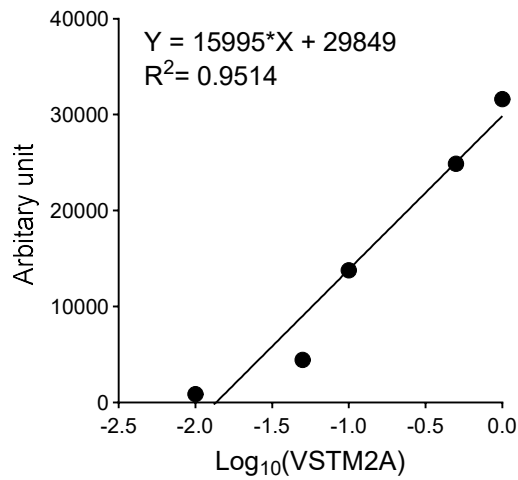

B

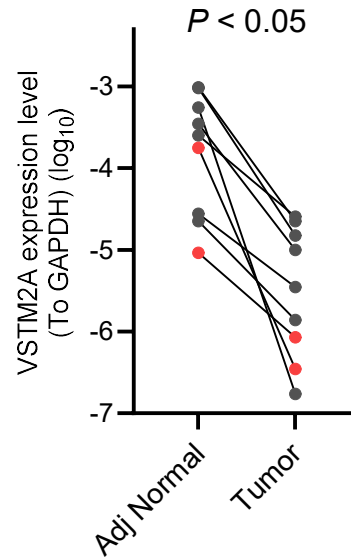

**Figure S3. (A)** Protein standard curve using Recombinant human VSTM2A. **(B)** VSTM2A mRNA in primary tumour and matched adjacent nontumour tissue from CRC patients were determined by QPCR (n = 9). Expression data are shown following normalization for GAPDH. Data was analyzed by paired student T test. Two cases (in red) were subjected into western blot analysis.

**Figure S4**

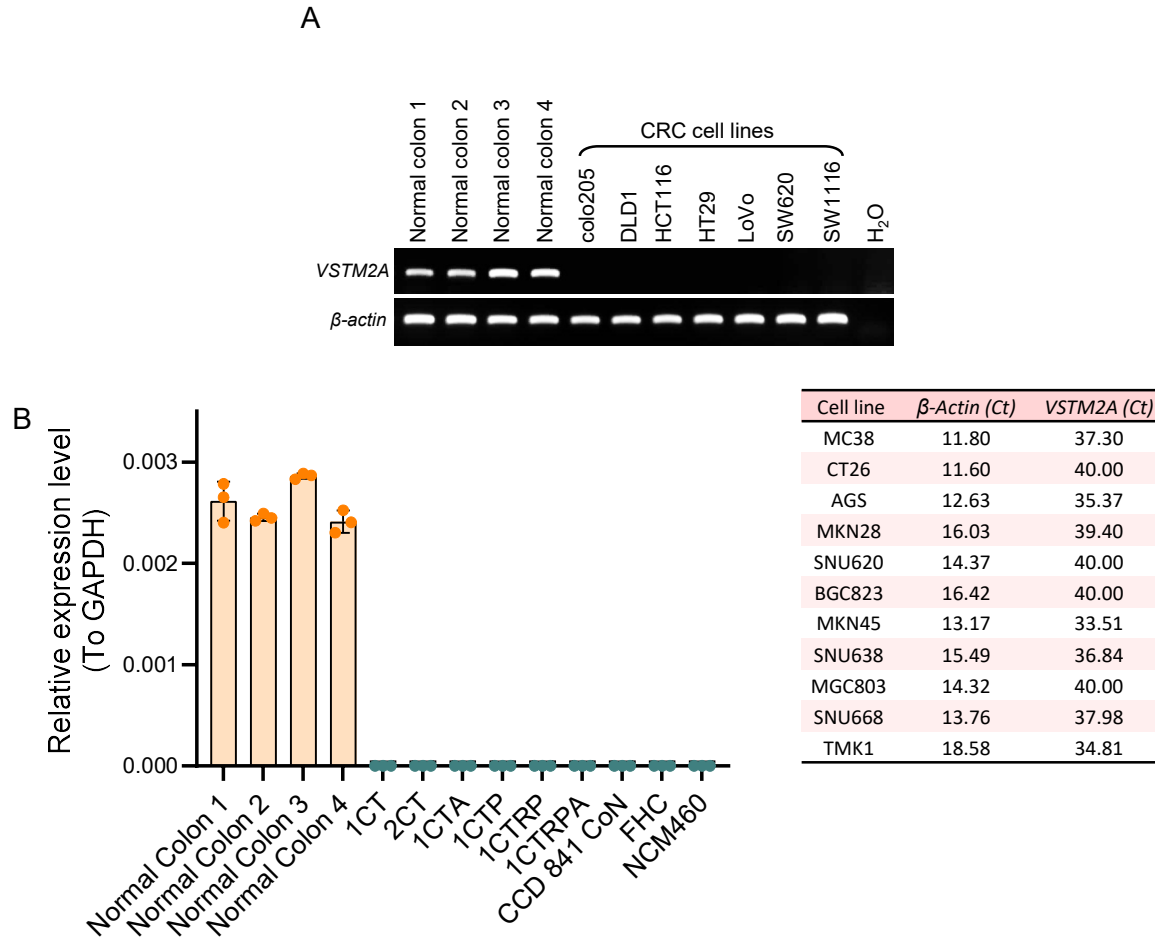

**Figure S4. (A)** Semi-PCR analysis of VSTM2A expression in normal colon tissues and CRC 2D cell lines. **(B)** QPCR analysis of transform and non-transformed human epithelial cells and murine CRC cell lines. Expression data are shown following normalization for GAPDH or  $\beta$ -Actin.

**Figure S5**

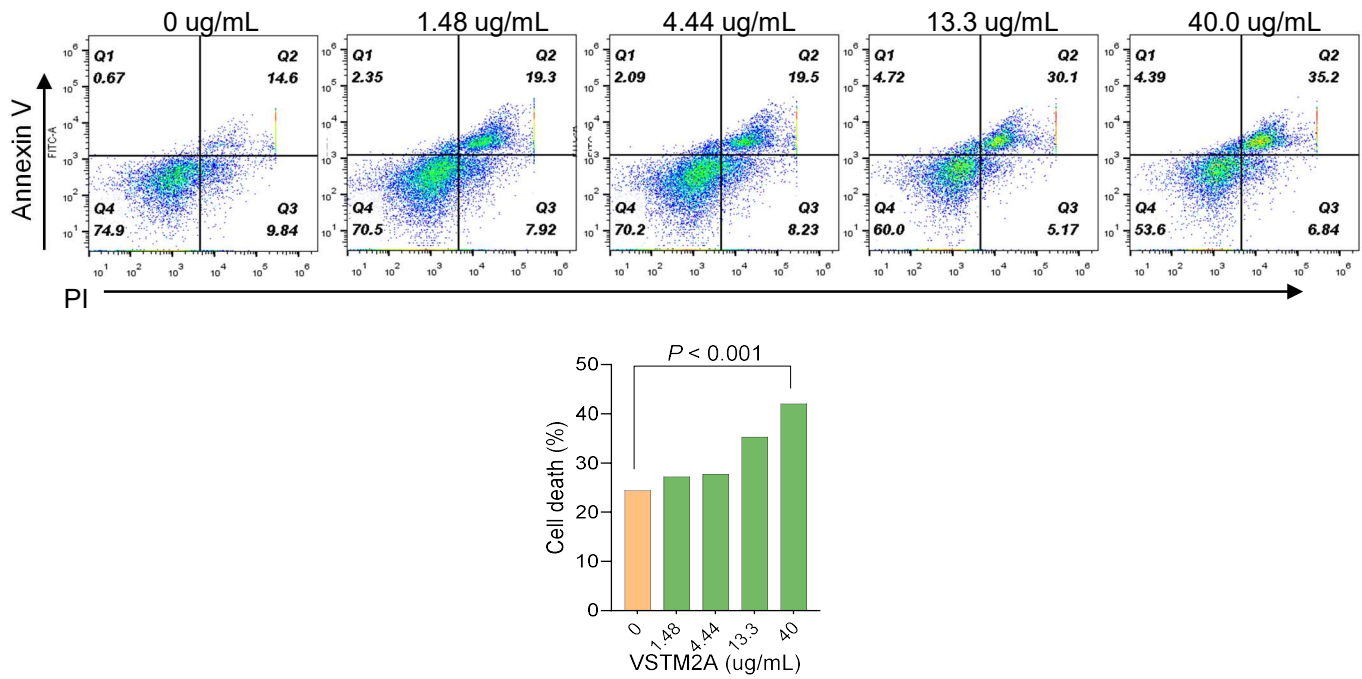

**Figure S5.** Cell apoptosis of PBMCs treated with various dose of recombinant human VSTM2A protein was quantified by flow cytometer.

**Figure S6**

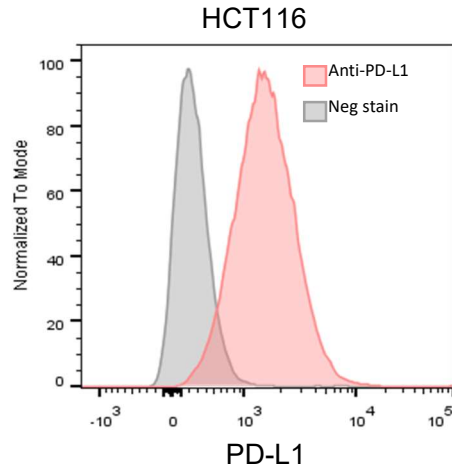

**Figure S6.** Cell surface expression of PD-L1 on HCT116 was determined by flow cytometry.

**Figure S7**

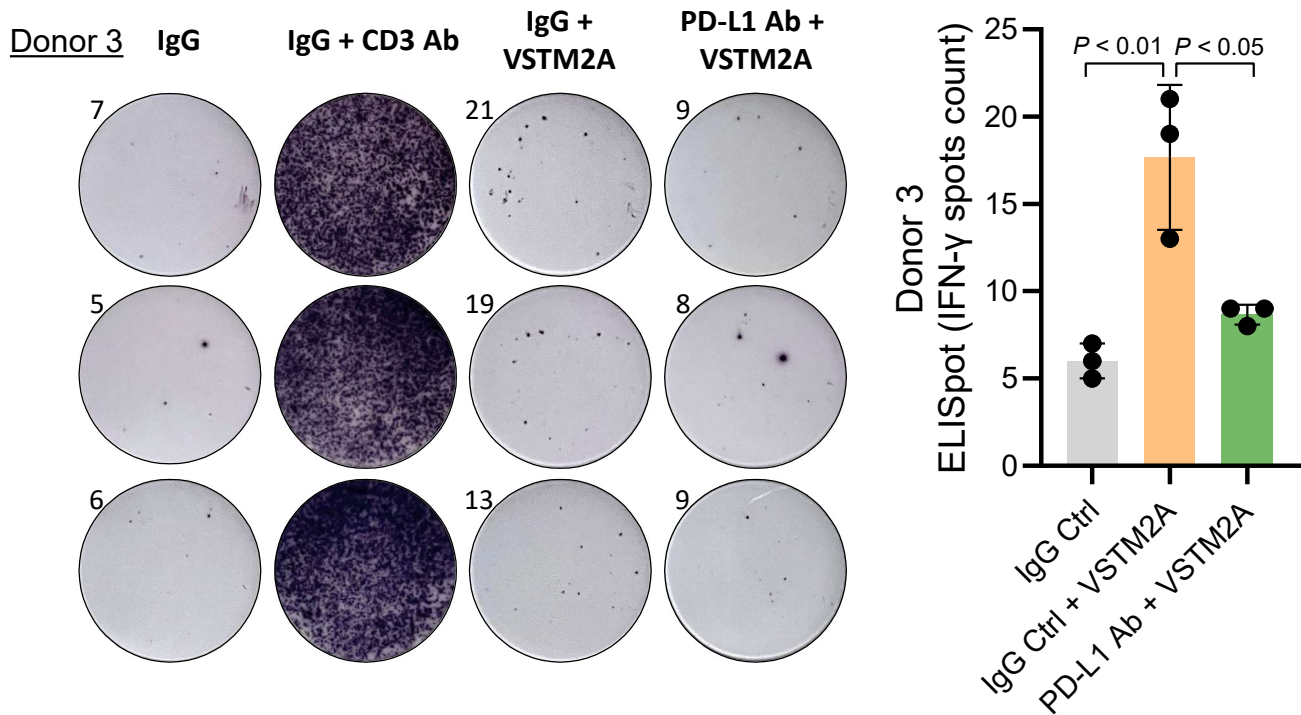

**Figure S7.** Images of the ELISpot assay showed the IFN- $\gamma$  secretion by PBMCs (Donor 3) following 24 hours stimulation with the anti-CD3 antibody, Durvalumab (anti-PD-L1 immune checkpoint inhibitor) in the presence or absence of VSTM2A recombinant protein (1  $\mu$ g/mL). Summary of the IFN- $\gamma$  spot number is showed in the right panel.



**Table S1. Correlation of VSTM2A expression with clinicopathologic parameters in 208 CRC patients.**

| Variable           | VSTM2A expression |       |             |       | P-value       |
|--------------------|-------------------|-------|-------------|-------|---------------|
|                    | Low (n=116)       | %     | High (n=92) | %     |               |
| <b>Gender</b>      |                   |       |             |       |               |
| Female             | 53                | 46.49 | 36          | 39.13 | 0.3234        |
| Male               | 61                | 53.51 | 56          | 60.87 |               |
| <b>Age*</b>        |                   |       |             |       |               |
| ≤60                | 33                | 28.95 | 28          | 30.43 | 0.8784        |
| >60                | 81                | 71.05 | 64          | 69.57 |               |
| <b>AJCC stage*</b> |                   |       |             |       |               |
| I/II               | 36                | 31.58 | 45          | 48.91 | <b>0.0146</b> |
| III/IV             | 78                | 68.42 | 47          | 51.09 |               |
| <b>CD8a</b>        |                   |       |             |       |               |
| High               | 37                | 31.90 | 52          | 56.52 | <b>0.0004</b> |
| Low                | 79                | 68.10 | 40          | 43.48 |               |

\* 208 Case in the TMA in total with 2 cases missing of Gender, Age and AJCC stages information.

**Table S2. Antibodies and QPCR primers used in this study.**

| <b>Target</b>              | <b>Supplier</b>           | <b>Catalogue</b> |
|----------------------------|---------------------------|------------------|
| Anti-human/mouse VSTM2A    | Sigma-Aldrich             | HPA024134        |
| Anti-human GAPDH           | ThermoFisher Scientific   | PA585074         |
| Anti-human PD-L1           | R&D systems               | AF156            |
| Anti-human Phospho-LRP6    | Cell Signaling Technology | 2568P            |
| Anti-Flag                  | Sigma-Aldrich             | F1804            |
| Anti-human CD8a            | BioLedend                 | 372902           |
| Anti-human PD-L1 APC       | BioLegend                 | 329707           |
| Anti-mouse CD8a            | ThermoFisher Scientific   | 14008182         |
| Anti-mouse CD45 FITC       | BD Biosciences            | 553080           |
| Anti-mouse CD3 PerCP-Cy5.5 | BD Biosciences            | 560527           |
| Anti-mouse CD45 BV510      | BioLegend                 | 103137           |
| Anti-mouse CD8 PerCP-Cy5.5 | BioLegend                 | 100733           |
| Anti-mouse CD3 PE          | BioLegend                 | 100206           |

  

| <b>Target</b>   | <b>Sequence</b>        |
|-----------------|------------------------|
| Human-VSTM2A-QF | GGACCAAGATCAGCACAGTGAA |
| Human-VSTM2A-QR | TCATCCTTTTTCTCACTTTGGA |
| Human-GAPDH-QF  | GCACCACCAACTGCTTAGCA   |
| Human-GAPDH-QR  | TCTTCTGGGTGGCAGTGATG   |
| Human-ACTB-QF   | GTCTTCCCCTCCATCGTG     |
| Human-ACTB-QR   | AGGGTGAGGATGCCTCTCTT   |
| Ms-Vstm2a-QF    | ATGTGGCTGCAAGACACGAA   |
| Ms-Vstm2a-QR    | GGCTGGAGGTGGAGTGCAT    |
| Ms-Actin-QF     | GGCTGTATTCCCCTCCATCG   |
| Ms-Actin-QR     | CCAGTTGGTAACAATGCCATG  |
